# Supplementary material for: Enhanced NH3 and NO sensing performance of Ti3C2O2 MXene by biaxial strain: insights from first-principles calculations
Source: Royal Society of Chemistry journal article supplement (doi:10.1039/d4cp04127e), 2025-01-01
Supplement: d4cp04127e1.pdf [file d4cp04127e1.pdf]

## Supplementary Information

### Enhanced NH<sub>3</sub> and NO Sensing Performance of Ti<sub>3</sub>C<sub>2</sub>O<sub>2</sub> MXene by biaxial strain: Insights from First-Principles Calculations

Satchakorn Khammuang<sup>1</sup>, Kantaphong Wongphen<sup>1</sup>, Tanveer Hussain<sup>2</sup>, and Komsilp Kotmool<sup>1\*</sup>

<sup>1</sup> College of Advanced Manufacturing Innovation, King Mongkut's Institute of Technology Ladkrabang, Bangkok 10520, Thailand; Tel: 66 2329 8264; E-mail: [komsilp.ko@kmitl.ac.th](mailto:komsilp.ko@kmitl.ac.th)\*

<sup>2</sup> School of Science and Technology, University of New England, Armidale, New South Wales 2351, Australia

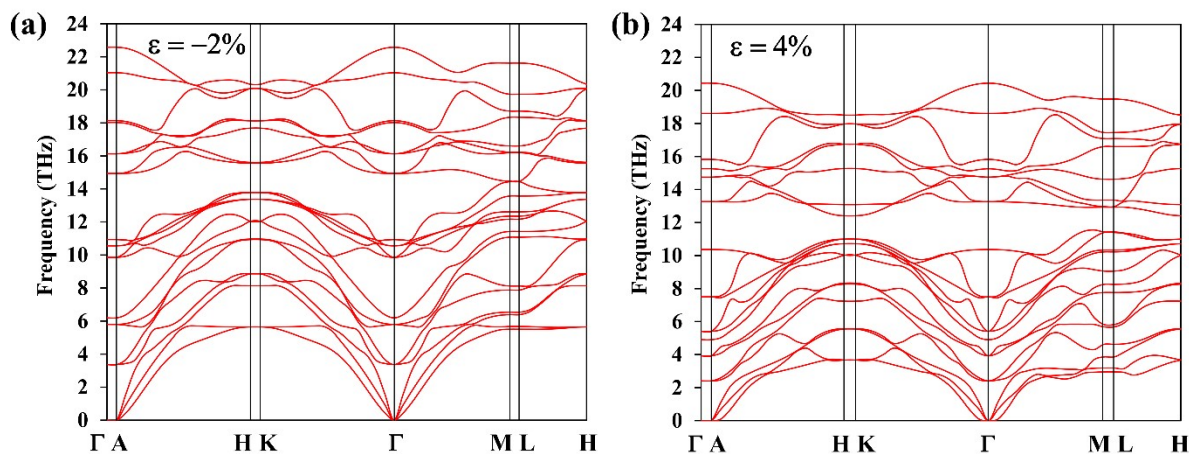

**Fig. 1S** Phonon dispersion curves of Ti<sub>3</sub>C<sub>2</sub>O<sub>2</sub> at strains of -2% and 4% represented by panel (a), and (b), respectively.

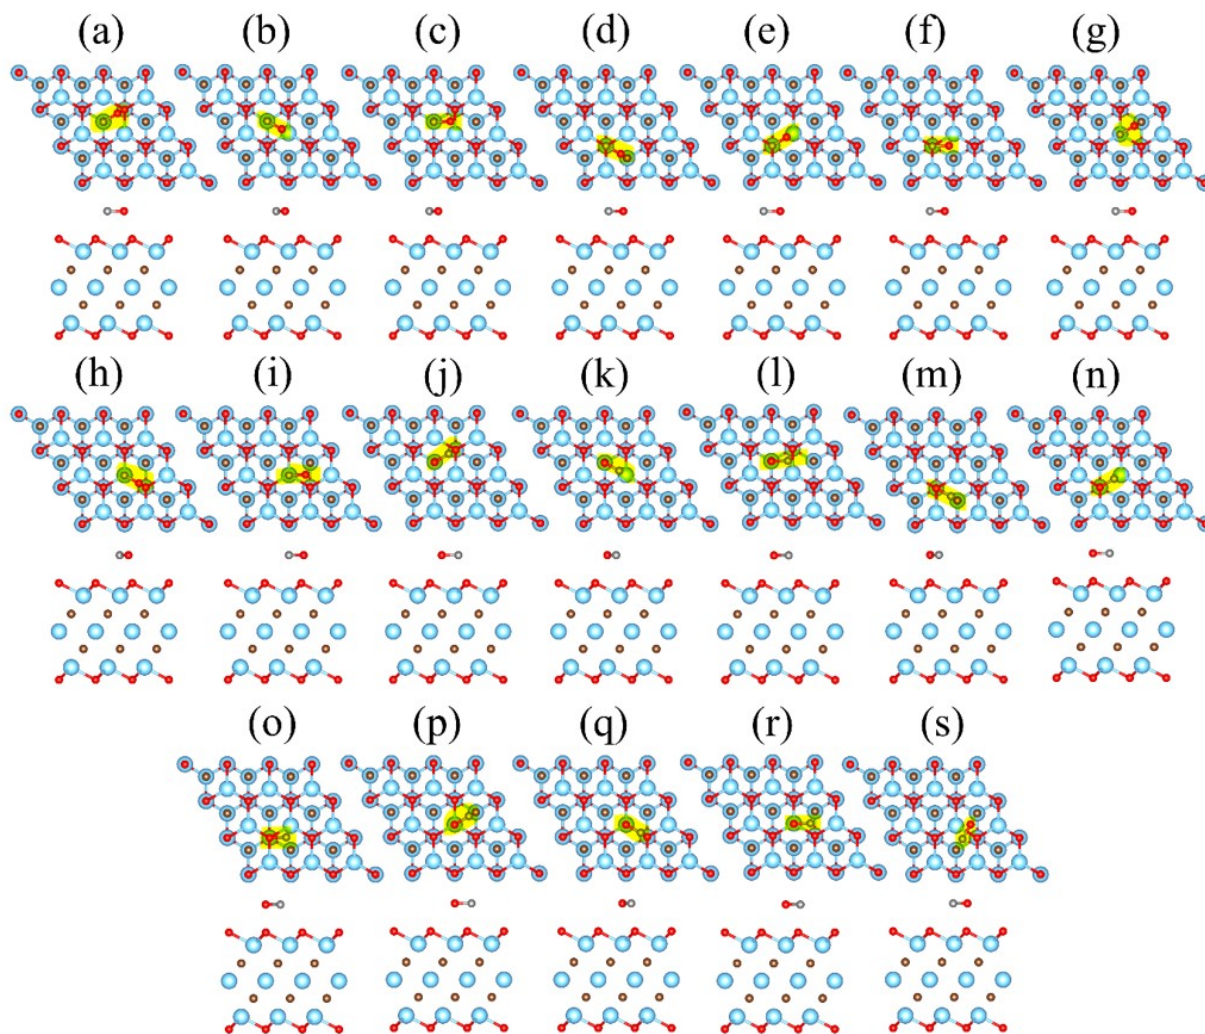

**Fig. 2S** Top and side views of the possible adsorption sites of CO and NO on  $\text{Ti}_3\text{C}_2\text{O}_2$ . The azure, brown, red, and grey balls represent the Ti, C, O, and C or N of gases, respectively. The yellow-highlighted area in the top view clearly indicates the position of the gases.

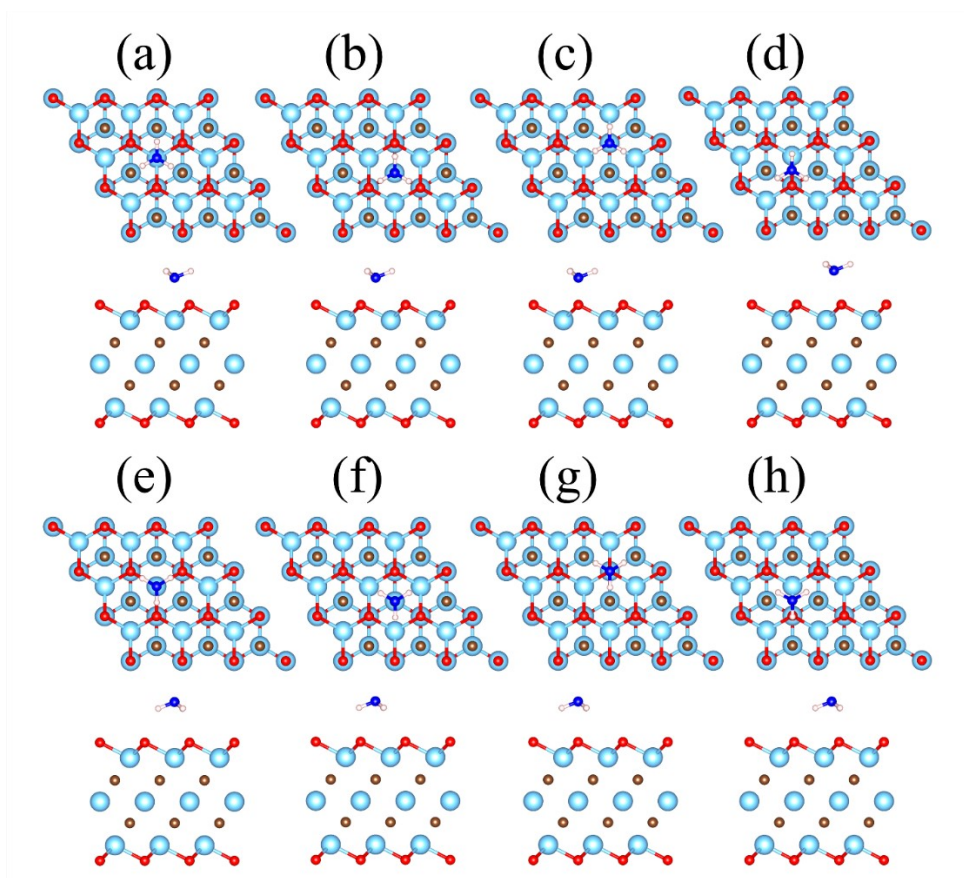

**Fig. 3S** Top and side views of the possible adsorption sites of  $\text{NH}_3$  on  $\text{Ti}_3\text{C}_2\text{O}_2$ . adsorption site configuration on  $\text{Ti}_3\text{C}_2\text{O}_2$  surface. The azure, brown, red, blue, and pink balls represent the Ti, C, O, N, and H, respectively.

**Table 1S** The Mulliken charge analysis of CO, NH<sub>3</sub>, and NO before and after adsorption on Ti<sub>3</sub>C<sub>2</sub>O<sub>2</sub>.

|                       | Gases                 | Species   | States |      | Charge (e) |
|-----------------------|-----------------------|-----------|--------|------|------------|
|                       |                       |           | s      | p    |            |
| <b>Before</b>         | <b>CO</b>             | C         | 1.68   | 1.90 | 0.42       |
|                       |                       | O         | 1.84   | 4.57 | -0.42      |
|                       | <b>NH<sub>3</sub></b> | N         | 1.75   | 4.49 | -1.23      |
|                       |                       | H         | 0.59   | -    | 0.41       |
|                       |                       | H         | 0.59   | -    | 0.41       |
|                       | <b>NO</b>             | N         | 1.80   | 3.07 | 0.13       |
|                       |                       | O         | 1.84   | 4.29 | -0.13      |
|                       | <b>After</b>          | <b>CO</b> | C      | 1.66 | 1.95       |
| O                     |                       |           | 1.84   | 4.53 | -0.37      |
| <b>NH<sub>3</sub></b> |                       | N         | 1.68   | 4.32 | -1.00      |
|                       |                       | H         | 0.65   | -    | 0.35       |
|                       |                       | H         | 0.65   | -    | 0.35       |
| <b>NO</b>             |                       | N         | 1.79   | 2.97 | 0.24       |
|                       |                       | O         | 1.84   | 4.20 | -0.05      |

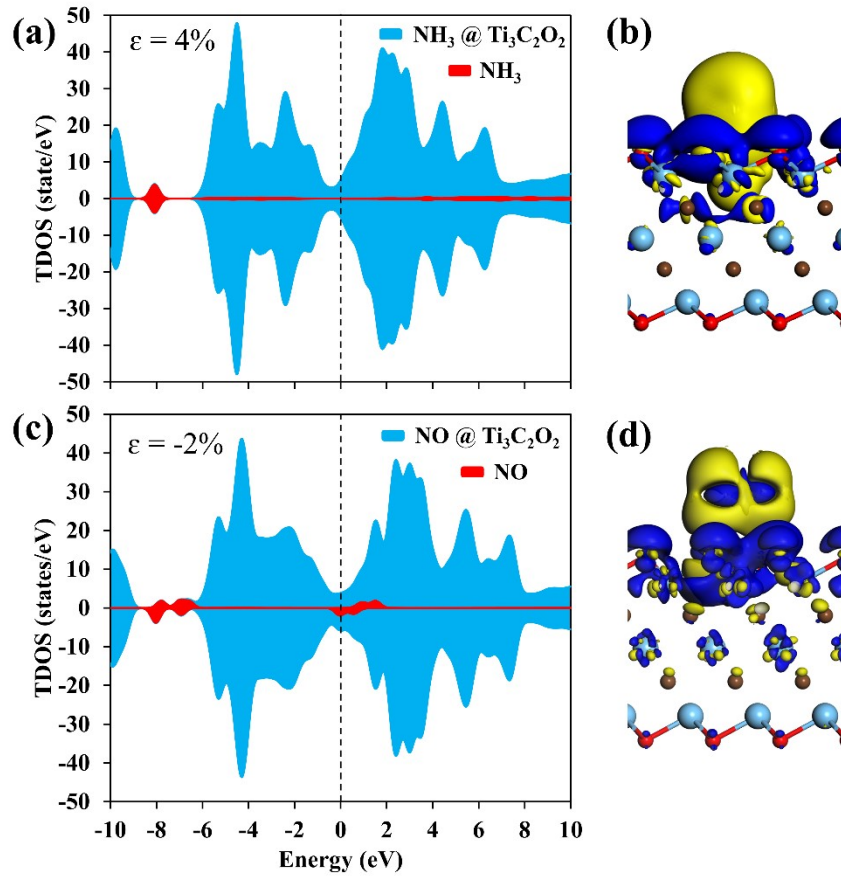

**Fig. 4S** Electronic density of state (TDOS) and electron differences density (EDD) of (a, b) NH<sub>3</sub> adsorbed on Ti<sub>3</sub>C<sub>2</sub>O<sub>2</sub> at 4% strain and (c, d) NO adsorbed on Ti<sub>3</sub>C<sub>2</sub>O<sub>2</sub> at -2% strain.

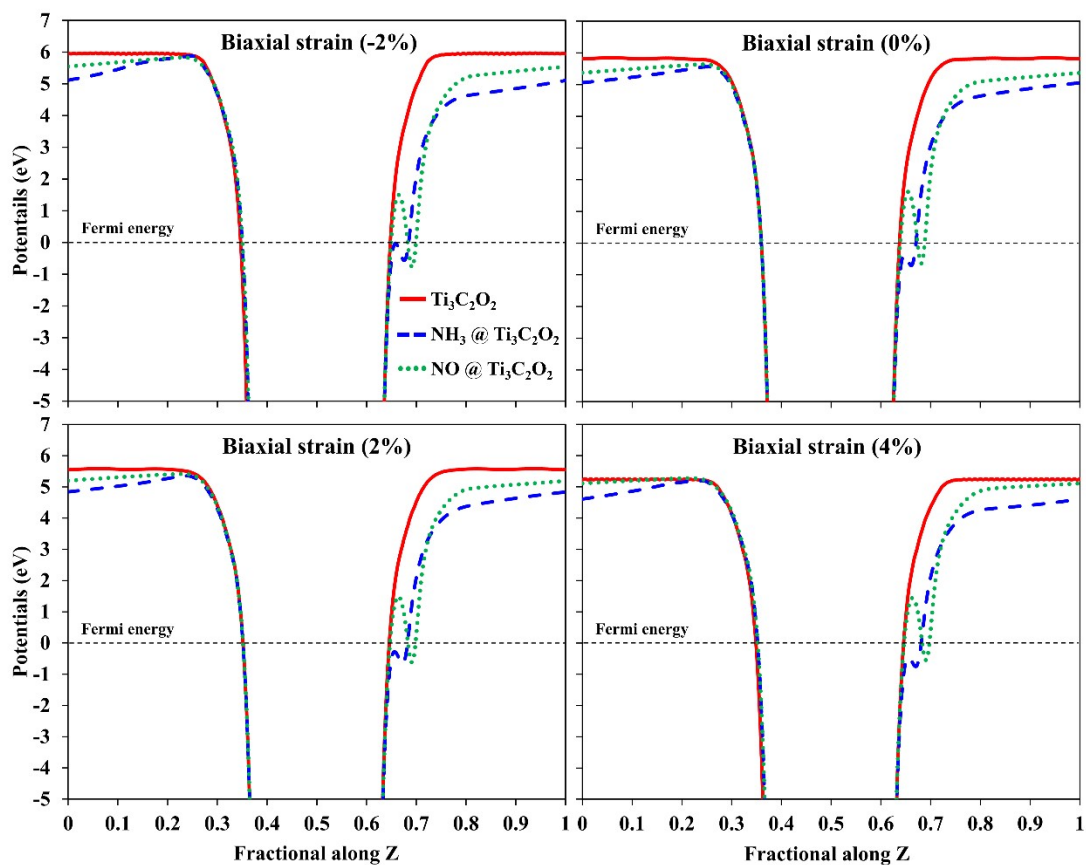

**Fig. 5S** Electrostatic potentials of toxic gas molecules adsorption on  $\text{Ti}_3\text{C}_2\text{O}_2$  under biaxial strain -2% to 4%.
